# Supplementary material for: Directed Evolution of Herbicide Biosensors in a Fluorescence-Activated Cell-Sorting-Compatible Yeast Two-Hybrid Platform
Source: PubMed Central journal article supplement (PMC9396700; doi:10.1021/acssynbio.2c00297), 2022-08-03
Supplement: sb2c00297_si_001.pdf [file sb2c00297_si_001.pdf]

## **Supplementary information**

# **Directed evolution of herbicide biosensors in a FACS-compatible yeast two-hybrid platform**

Gil Zimran, Erez Feuer, Oded Pri-Tal, Michal Shpilman and Assaf Mosquna\*

The Robert H. Smith Institute of Plant Sciences and Genetics in Agriculture, The Hebrew University of Jerusalem, Rehovot 7610000, Israel.

\*Corresponding author

## Supplementary methods

### Phosphatase inhibition assay

The coding sequences of BdPYL3 and AtHAB1 were cloned into pET28 (EMD Biosciences), allowing the expression of a 6XHIS-tagged protein in transformed BL21 (DE3) *pLYS* (Promega, [www.promega.com](http://www.promega.com)). For AtHAB1 purification, 1 L LB was inoculated with 50 ml overnight culture and grown at 30 °C, 200 rpm. At  $OD_{600}=0.4$ ,  $MnCl_2$  was added to a final concentration of 4 mM. At  $OD_{600}=0.9$ , the culture was briefly placed on ice to arrest bacterial growth, and supplemented with 1 mM IPTG to induce recombinant protein expression. Cultures were maintained overnight at 23°C/200 rpm, prior to cell harvesting and resuspension in 3 ml/g TBS [50 mM TRIS, 150 mM NaCl, pH 7.5] supplemented with 10 mM imidazole, 10 mM  $MnCl_2$  and 1 tablet/50 ml of cOmplete™ Protease Inhibitor Cocktail (Sigma). Cell suspensions were lysed by two rounds of freezing and thawing, sonicated and centrifuged. Lysates were subsequently passed through 3 ml Ni-NTA beads (QIAGEN) and washed by passing 60 volumes of suspension buffer with 30 mM imidazole. Phosphatase was eluted with suspension buffer containing 250 mM imidazole and 1 mM tris(2-carboxyethyl)phosphine (TCEP). Overnight dialysis was performed in TBS buffer supplemented with 10 mM  $MnCl_2$ , 1 mM TCEP and glycerol 20%. Purification of BdPYL3 variants was performed similarly with the following differences: pre-growth and expression were performed in TB without  $MnCl_2$ . In addition, following IPTG induction, the cultures were maintained at 15°C/200 rpm. Further, rather than TBS, Buffer A [50 mM  $NaH_2PO_4$ , 300 mM NaCl, pH 8.0 and tablet/50 ml cOmplete™] was used for lysis, wash and elution steps (imidazole concentration and volume-ratios for each step were identical). Buffer was exchanged to TBS (without  $MnCl_2$ ) by overnight dialysis.

The phosphatase inhibition reaction included 33 mM Tris acetate (pH 7.9), 66 mM potassium acetate, 0.1% bovine serum albumin, 10 mM  $MnCl_2$ , 0.1%  $\beta$ -ME, 50 mM pNPP and increasing concentrations of either ABA or other tested ligands. To ensure consistency between preparations, phosphatase reactions contained a volume of purified 6XHIS-HAB1-GFP which resulted in  $\Delta OD_{405} +0.5$  in a 2-min receptor-free reaction. Reactions containing a saturating amount of ligand (100  $\mu$ M) and increasing volumes of receptor were performed to experimentally establish an effective 1:1 PYL:phosphatase ratio for each purified batch of the BdPYL3 variants. Reaction mixture was allowed to equilibrate for 5 min prior to addition of substrate. Rate of pNPP hydrolysis by phosphatase was inferred from  $\Delta OD_{405}$  during 5 min of the reaction at linear phase. Values represent percentage activity compared with phosphatase activity without a receptor.

## Supplementary figures and tables

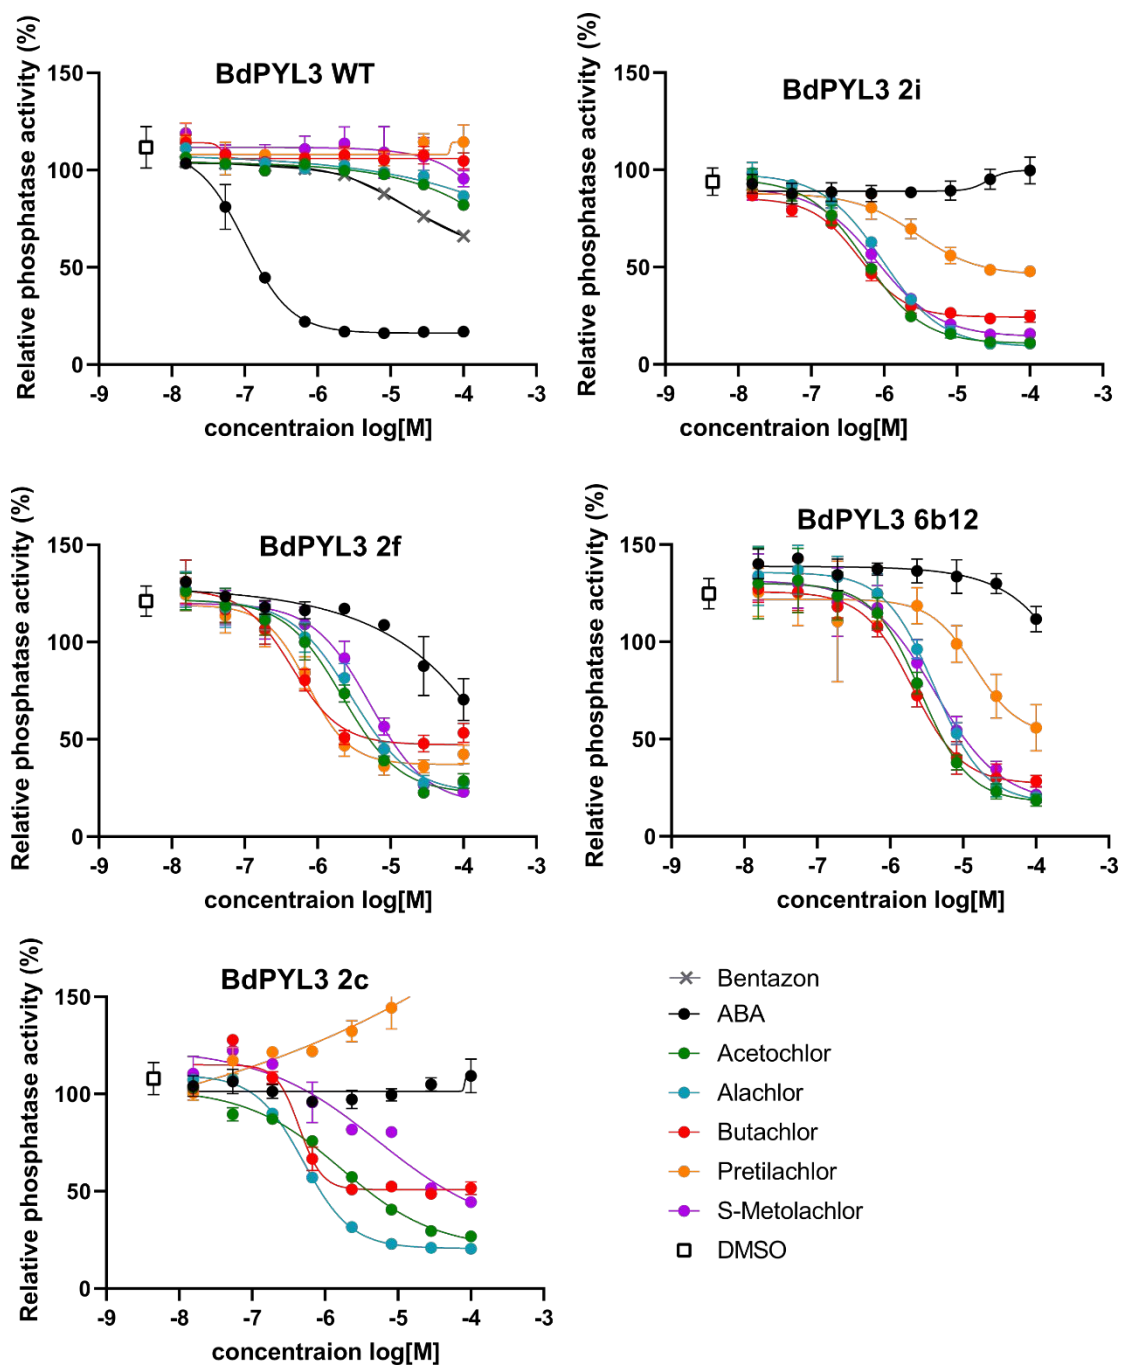

Figure S1 – Dose-dependent inhibition of recombinant 6XHIS-AtHAB1 (PP2C-type phosphatase) by recombinant 6XHIS-BdPYL3<sup>WT</sup> and other recombinant variants. The effect of Alachlor, Acetochlor and Bentazon in this *in vitro* assay confirms that these herbicides act as true BdPYL3<sup>WT</sup> agonists and do not operate indirectly or following chemical modification *in vivo*. Findings regarding the improved response of several BdPYL3 variants to chloroacetamides are reflected in this independent *in vitro* assay. An exception was the reverse response of BdPYL3<sup>2c</sup> to Pretilachlor, which was reproduced in multiple repeated assays. AtHAB1 activity is expressed as percentage of a reaction in the absence of a receptor. Further information regarding this assay is provided in supplementary materials and methods.

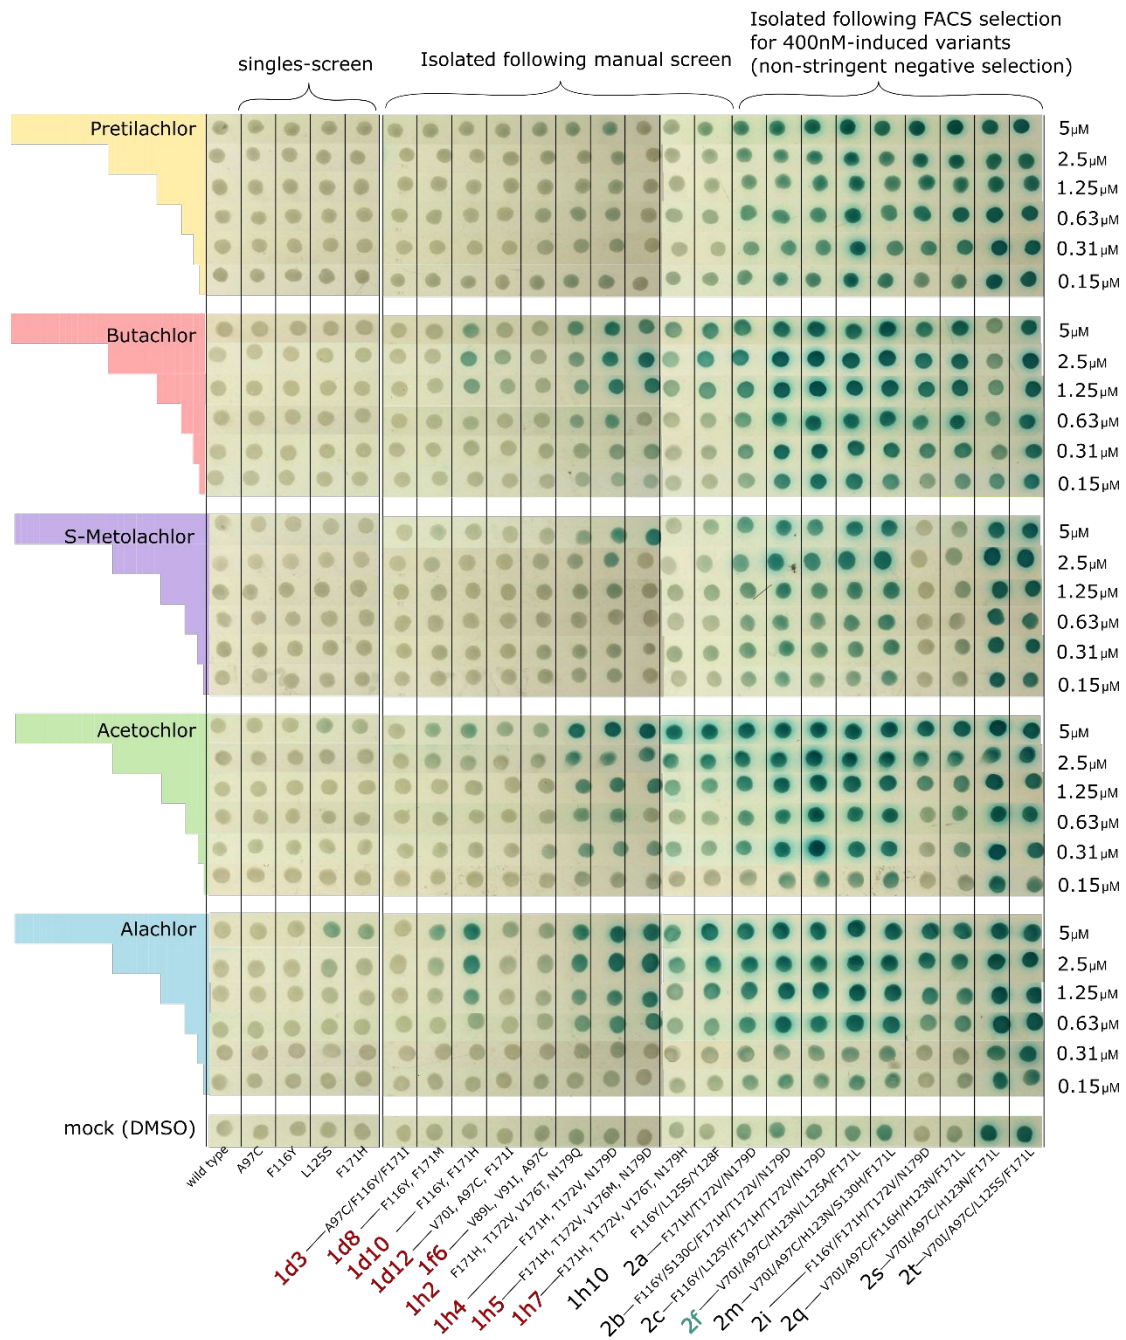

Figure S2- Summary of the Y2H assay of BdPYL3 variants isolated up to and including the first FACS-based selection performed in this work. Lines expressing different variants were dotted on synthetic dextrose medium supplemented with the specified chemical treatment, and allowed to grow for 2 days. Receptor-phosphatase interactions were assayed by measuring the expression of the LacZ reporter gene through LacZ/X-gal activity staining. Variations in the original BdPYL3WT polypeptide sequence are listed below each column. Identifiers for different variants are specified below if used in the main or supplementaty text. Variants which were the background for the construction of library #6 are indicated in red. Variants 5a and 5b were derived from variant 2f, which is highlighted here in cyan.

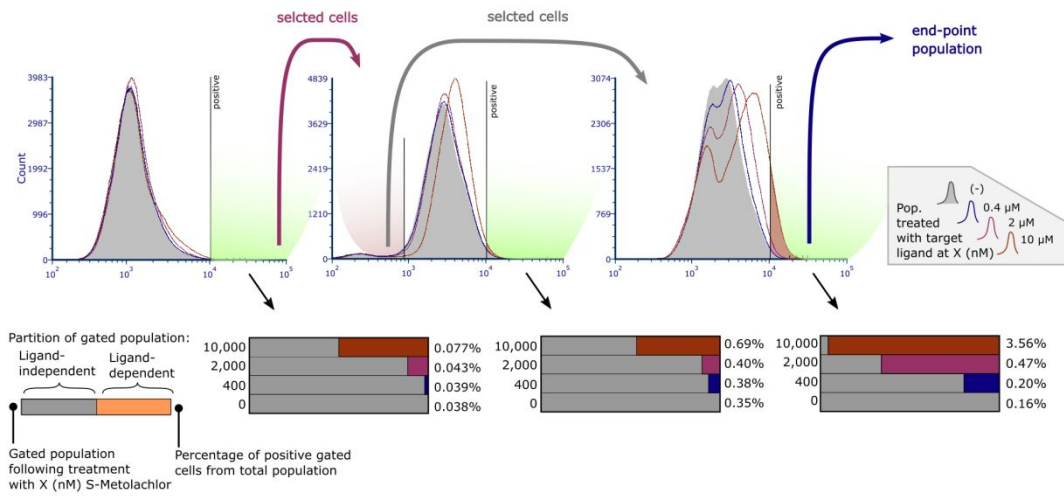

Figure S3 – FACS-recorded data of population-scale dynamics during an exemplary round of selection. An error-prone library (average of 4 substitutions/gene) was selected for improved ligand-dependent receptors for *S*-Metolachlor. Within each step, the same population was sectioned and treated with different doses of the target ligand (each represented by a histogram of  $\sim 5 \times 10^5$  events). The specific GFP intensity gate shown was not used *de facto* for sorting (in step II, for example, a negative gate was used to collect cells), rather, it served as an arbitrary (yet consistent) threshold by which cells were retroactively categorized as positive or negative. The purpose of this experiment was to test how with each selective step, clones expressing improved receptor variants, are amplified and make up an increasingly larger fraction of the final population. Each horizontal bar represents the inferred partition of constitutive-positive vs ligand-induced positive clones, gated post-treatment with a given ligand concentration (specified on the left). The size of each gated population, expressed as a percentage of the total population, is indicated on the right side.

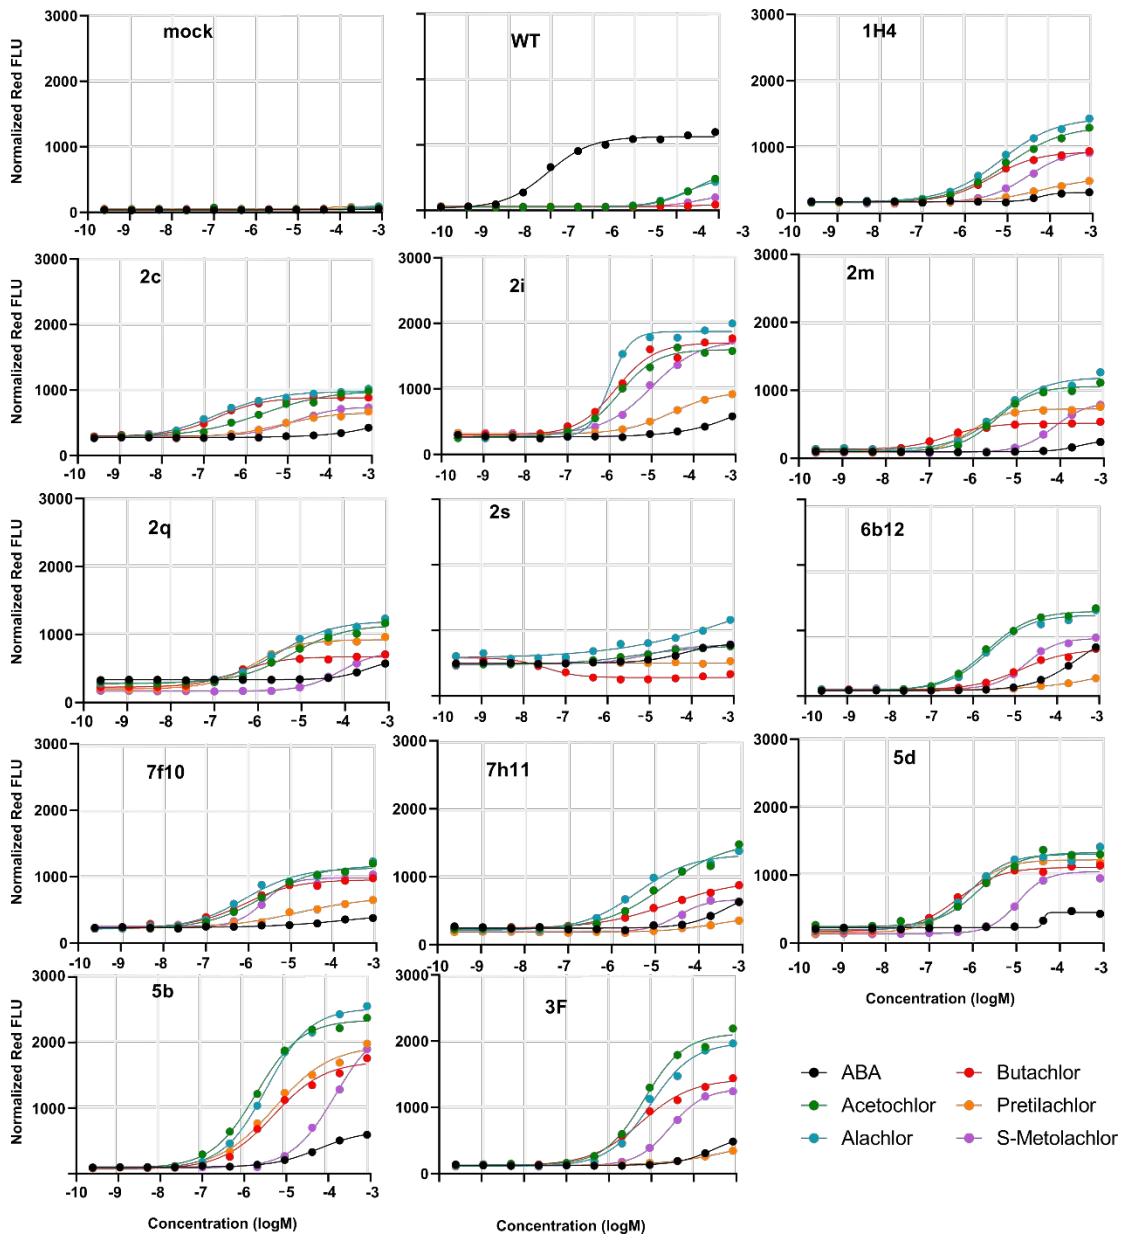

Figure S4 – *In vivo* binding curves of receptor variants not presented in the main text. Chloroacetamide-responsive variants were isolated during various stages of this study. Readout of receptor-phosphatase interactions is generated by a plasmid-encoded Y2H system with GAL4-regulated *mScarlet-I* as a reporter gene, in 96-well plates. The mock line was isogenic to the other yeast lines but harbored an empty *pBD-GAL4* vector.

Table S1 – Herbicides tested in the single-substitution mutant screen and other experiments in this study<sup>1</sup>.

| Compound name        | CAS identifier | HRAC classification | Mode of action                                                                                       | Chemical sub-class         |
|----------------------|----------------|---------------------|------------------------------------------------------------------------------------------------------|----------------------------|
| Acetochlor           | 34256-82-1     | 15                  | Inhibition of Very Long-Chain Fatty Acid Synthesis                                                   | a-chloroacetamide          |
| Aclonifen            | 74070-46-5     | 32                  | Inhibition of Solanesyl Diphosphate Synthase                                                         |                            |
| Alachlor             | 15972-60-8     | 15                  | Inhibition of Very Long-Chain Fatty Acid Synthesis                                                   | a-chloroacetamide          |
| Ametryne             | 834-12-8       | 5                   | Inhibition of Photosynthesis at PS II<br>D1 Serine 264 binders (and other non-histidine 215 binders) | Triazines                  |
| Amitrole             | 61-82-5        | 34                  | Inhibition of Lycopene Cyclase                                                                       |                            |
| Atrazine             | 1912-24-9      | 5                   | Inhibition of Photosynthesis at PS II<br>D1 Serine 264 binders (and other non-histidine 215 binders) | Triazines                  |
| Benfenin             | 1861-40-1      | 3                   | Inhibition of Microtubule Assembly                                                                   | Dinitroanilines            |
| Bentazone            | 25057-89-0     | 6                   | D1 Histidine 2<br>Inhibition of Photosynthesis at PS II<br>15 binders                                |                            |
| Butachlor            | 23184-66-9     | 15                  | Inhibition of Very Long-Chain Fatty Acid Synthesis                                                   | a-chloroacetamide          |
| Chlorsulfuron        | 64902-72-3     | 2                   | Inhibition of Acetolactate Synthase                                                                  | Sulfonylurea               |
| Chlortoluron         | 15545-48-9     | 5                   | Inhibition of Photosynthesis at PS II<br>D1 Serine 264 binders (and other non-histidine 215 binders) | Ureas                      |
| Clodinafop-Propargyl | 105512-06-9    | 1                   | Inhibition of Acetyl CoA Carboxylase                                                                 | Aryloxyphenoxy-propionates |
| DCPA (Dacthal)       | 1861-32-1      | 3                   | Inhibition of Microtubule Assembly                                                                   |                            |
| Desmedipham          | 13684-56-5     | 5                   | Inhibition of Photosynthesis at PS II<br>D1 Serine 264 binders (and other non-histidine 215 binders) | Phenylcarbamates           |
| Dicamba              | 1918-00-9      | 4                   | Auxin mimics                                                                                         | Benzoates                  |
| Diclofop-methyl      | 51338-27-3     | 1                   | Inhibition of Acetyl CoA Carboxylase                                                                 | Aryloxyphenoxy-propionates |
| Diphenamide          | 957-51-7       | ∅                   | Unknown Mode of Action                                                                               |                            |
| Diuron               | 330-54-1       | 5                   | Inhibition of Photosynthesis at PS II<br>D1 Serine 264 binders (and other non-histidine 215 binders) | Ureas                      |
| Ethofumesate         | 26225-79-6     | 15                  | Inhibition of Very Long-Chain Fatty Acid Synthesis                                                   | Benzofuranes               |
| Fenoxaprop-ethyl     | 66441-23-4     | 1                   | Inhibition of Acetyl CoA Carboxylase                                                                 | Aryloxyphenoxy-propionates |

<sup>1</sup> Assignment of herbicides to mode-of-action classes and chemical sub-classes was according to Herbicide Resistance Action Committee (HRAC) classification<sup>1</sup>.

|                         |             |    |                                                                                                   |                            |
|-------------------------|-------------|----|---------------------------------------------------------------------------------------------------|----------------------------|
| Flufenacet              | 142459-58-3 | 15 | Inhibition of Very Long-Chain Fatty Acid Synthesis                                                | $\alpha$ -Oxyacetamides    |
| Fluometuron             | 2164-17-2   | 5  | Inhibition of Photosynthesis at PS II D1 Serine 264 binders (and other non-histidine 215 binders) | Ureas                      |
| Flurochloridone         | 61213-25-0  | 12 | Inhibition of Phytoene Desaturase                                                                 | N-Phenyl heterocycles      |
| Glyphosate              | 1071-83-6   | 9  | Inhibition of Enolpyruvyl Shikimate Phosphate Synthase                                            |                            |
| Imazapic                | 104098-48-8 | 2  | Inhibition of Acetolactate Synthase                                                               | Imidazolinone              |
| Imazethapyr             | 81335-77-5  | 2  | Inhibition of Acetolactate Synthase                                                               | Imidazolinone              |
| Isoproturon             | 34123-59-6  | 5  | Inhibition of Photosynthesis at PS II D1 Serine 264 binders (and other non-histidine 215 binders) | Ureas                      |
| Norflurazon             | 27314-13-2  | 12 | Inhibition of Phytoene Desaturase                                                                 | N-Phenyl heterocycles      |
| Oxadiazon               | 19666-30-9  | 14 | Inhibition of Protoporphyrinogen Oxidase                                                          | N-Phenyl-oxadiazolones     |
| Phenmedipham            | 13684-63-4  | 5  | Inhibition of Photosynthesis at PS II D1 Serine 264 binders (and other non-histidine 215 binders) | Phenylcarbamates           |
| Pinoxaden               | 243973-20-8 | 1  | Inhibition of Acetyl CoA Carboxylase                                                              |                            |
| Pretilachlor            | 51218-49-6  | 15 | Inhibition of Very Long-Chain Fatty Acid Synthesis                                                | a-chloroacetamide          |
| Propaquizalofop         | 111479-05-1 | 1  | Inhibition of Acetyl CoA Carboxylase                                                              | Aryloxyphenoxy-propionates |
| Propyzamide (pronamide) | 23950-58-5  | 3  | Inhibition of Microtubule Assembly                                                                | Dinitroanilines            |
| Pyroxasulfone           | 447399-55-5 | 15 | Inhibition of Very Long-Chain Fatty Acid Synthesis                                                | Isoxazolines               |
| Quizalofop-p-ethyl      | 100646-51-3 | 1  | Inhibition of Acetyl CoA Carboxylase                                                              | Aryloxyphenoxy-propionates |
| S-Metolachlor           | 87392-12-9  | 15 | Inhibition of Very Long-Chain Fatty Acid Synthesis                                                | a-chloroacetamide          |
| Terbutryn               | 886-50-0    | 5  | Inhibition of Photosynthesis at PS II D1 Serine 264 binders (and other non-histidine 215 binders) | Triazines                  |
| Tralkoxydim             | 87820-88-0  | 1  | Inhibition of Acetyl CoA Carboxylase                                                              | Cyclohexanediones          |
| Trifluralin             | 1582-09-8   | 3  | Inhibition of Microtubule Assembly                                                                | Dinitroanilines            |



Table 2 – Outline of library construction

| # | Library                               | Fixed mutations/<br>background variants  | Randomized residues                                                                                                                            | Fragments | PCR amplification |     | Theoretical complexity                                  | screen              | isolates                                                                                                              |                      |                            |
|---|---------------------------------------|------------------------------------------|------------------------------------------------------------------------------------------------------------------------------------------------|-----------|-------------------|-----|---------------------------------------------------------|---------------------|-----------------------------------------------------------------------------------------------------------------------|----------------------|----------------------------|
|   |                                       |                                          |                                                                                                                                                |           | Primers           |     |                                                         |                     |                                                                                                                       | Template             |                            |
|   |                                       |                                          |                                                                                                                                                |           | FWD               | REV |                                                         |                     |                                                                                                                       |                      |                            |
| 1 | Singles around A97C shuffled          | A97C                                     | 70-V/I, 89-V/L                                                                                                                                 | 1         | 250               | 67  | A97C                                                    | 101                 | Libraries pooled, plated on 5uM Alachlor, Acetochlor or 5-Metolachlor. Manual screen under a fluorescent stereoscope. | 1F6                  |                            |
| 2 | Singles around F116Y shuffled         | F116Y                                    | 118-V/I, 123-H/N, 124-R/M, 128-Y/F/L                                                                                                           | 1         | 250               | 69  | F116Y                                                   |                     |                                                                                                                       | 10                   | 2                          |
| 3 | Singles around L125S shuffled         | L125S                                    | 118-V/I, 123-H/N, 124-R/M, 128-Y/F/L                                                                                                           | 1         | 250               | 69  | L125S                                                   | 10                  | 2                                                                                                                     |                      |                            |
| 4 | Singles around F171H shuffled         | F171H fixed                              | 172-T/I/M/G/V/A/L/R/S, 175-V/F, 175-V/M/N/T, 179-N/D/Q                                                                                         | 1         | 250               | 349 | F171H                                                   |                     |                                                                                                                       | 2.2*10 <sup>2</sup>  |                            |
| 5 | All singles shuffled                  | -                                        | 70-V/I, 89-V/L118-V/I, 123-H/N, 124-R/M, 128-Y/F/L118-V/I, 123-H/N, 124-R/M, 128-Y/F/L, 172-T/I/M/G/V/A/L/R/S, 175-V/F, 175-V/M/N/T, 179-N/D/Q | 1         | 250               | 241 | WT, K67C, K67N, V70I, pooled                            | 1.5*10 <sup>3</sup> |                                                                                                                       |                      | 1d3<br>1d8<br>1d10<br>1d12 |
|   |                                       |                                          |                                                                                                                                                | 2         | 240               | 243 | WT, V89L, V91I, A97C pooled                             |                     |                                                                                                                       |                      |                            |
|   |                                       |                                          |                                                                                                                                                | 3         | 242               | 245 | WT, F116Y, V118I, H123N, L125S/H/R, Y128F/L pooled      |                     |                                                                                                                       |                      |                            |
|   |                                       |                                          |                                                                                                                                                | 4         | 244               | 251 | WT, V171H/I/L, T172 I/V/L/G, V175F, V176M, N179D pooled |                     |                                                                                                                       |                      |                            |
| 6 | segment C randomized 1                | 1d3, 1d8, 1d10, 1d12, 1f6, 1h2, 1h4, 1h5 | 116, 118, 123, 124, 125, 128, 130 – all substitutions with custom synthesized dsDNA fragment pool*                                             | 1         | 250               | 243 | 1d3, 1d8, 1d10, 1d12, 1f6, 1h2, 1h4, 1h5, Pooled        | 7.8*10 <sup>5</sup> | 3 FACS rounds:<br>Positive after 0.4uM ala,<br>negative after dmsa (lower 20%)                                        | 2c<br>2f<br>2l       |                            |
|   |                                       |                                          |                                                                                                                                                | 2         | 242               | 245 | Synthesized dsDNA pool                                  |                     |                                                                                                                       |                      |                            |
|   |                                       |                                          |                                                                                                                                                | 3         | 244               | 251 | 1d3, 1d8, 1d10, 1d12, 1f6, 1h2, 1h4, 1h5, Pooled        |                     |                                                                                                                       |                      |                            |
| 7 | Segment E randomized 1                | 1h10, 1f6, 1d3, 1d12                     | 171, 172, 175, 176, 179                                                                                                                        | 1         | 250               | 241 | 1h10, 1f6, 1d3, 1d12 Pooled                             | 8*10 <sup>3</sup>   |                                                                                                                       | 3f, 7f10, 7h11, 6b12 |                            |
|   |                                       |                                          |                                                                                                                                                | 2         | 242               | 243 |                                                         |                     |                                                                                                                       |                      |                            |
|   |                                       |                                          |                                                                                                                                                | 3         | 244               | 248 |                                                         |                     |                                                                                                                       |                      |                            |
|   |                                       |                                          |                                                                                                                                                | 4         | 353-362           | 251 | WT                                                      |                     |                                                                                                                       |                      |                            |
| 8 | Segment E randomized 2                | 2c,2f,2l,3f,6b12                         | 171, 172, 175, 176, 179<br>With pool of degenerate NNK primers                                                                                 | 1         | 250               | 241 | 2c,2f,2l,3f,6b12<br>Pooled                              | 8*10 <sup>3</sup>   | 3 FACS rounds:<br>Positive after 0.16uM ala,<br>negative after dmsa (lower 2%)                                        | 5a<br>5b<br>5d       |                            |
| 9 | Segment E randomized on 5a background | 5a                                       | 175,176,179                                                                                                                                    | 1         | 250               | 349 | 5a                                                      | 6*10 <sup>2</sup>   | 3 FACS rounds:<br>Positive after 50nM ala negative after dmsa (lower 2%)                                              | 6a                   |                            |
|   | Segment E randomized on 5b background | 5b                                       | 175,176,179                                                                                                                                    | 2         | 348.1             | 251 |                                                         |                     |                                                                                                                       |                      |                            |
|   |                                       |                                          |                                                                                                                                                | 1         | 250               | 349 | 5b                                                      | 6*10 <sup>2</sup>   |                                                                                                                       |                      |                            |
|   |                                       |                                          |                                                                                                                                                | 2         | 348.2             | 251 |                                                         |                     |                                                                                                                       |                      |                            |

Table S3 – List of BdPYL3 variants

| identifier | Variations on the wild type BdPYL3 polypeptide sequence |
|------------|---------------------------------------------------------|
| 1D3        | A97C/F116Y/F171I                                        |
| 1D10       | F171H, T172V                                            |
| 1D12       | V70I, A97C, F171I                                       |
| 1F6        | V89L, V91I, A97C                                        |
| 1H2        | F171H, T172V, V176T, N179Q                              |
| 1H4        | F171H, T172V, N179D                                     |
| 1H5        | F171H, T172V, V176M, N179D                              |
| 1H7        | F171H, T172V, V176T, N179H                              |
| 1H10       | F116Y, L125S, Y128F                                     |
| 2a         | F171H, T172V, N179D                                     |
| 2b         | F116Y, S130C, F171H, T172V, N179D                       |
| 2c         | F116Y, L125Y, F171H, T172V, N179D                       |
| 2f         | V70I, A97C, H123N, L125A, F171L                         |
| 2i         | F116Y, F171H, T172V, N179D                              |
| 2m         | V70I, A97C, H123N, S130H, F171L                         |
| 2q         | V70I, A97C, F116H, H123N, F171L                         |
| 2s         | V70I, A97C, H123N, F171L                                |
| 2t         | V70I, A97C, L125S, F171L                                |
| 3f         | V89L, F116Y, S154Y, F171H, T172V                        |
| 7f10       | V89L, F116Y, S154Y, F171H, T172V, T176M, N179D          |
| 7h11       | G144V, F171H, T172V, V176T, N179Q                       |
| 6b12       | V89L, F171H, T172V, N179F                               |
| 5a         | V70I, A97C, H123N, L125A, F171C, T172C                  |
| 5b         | V70I, A97C, H123N, L125A, F171A, T172I                  |
| 5c         | V70I, A97C, H123N, L125A, S154Y, F171V                  |
| 5d         | V70I, A97C, H123N, L125A, F171I, V176A                  |

Table S4 - Sequences of ssDNA oligos used in library construction

| oligo index | name                                         | Sequence 5'-3'                                                                   |
|-------------|----------------------------------------------|----------------------------------------------------------------------------------|
| 67          | (A97C fix) rev                               | CTCTCTAACAGAACCACGC                                                              |
| 68          | (A97C fix) mutagenic fwd                     | GCGTGGGTTCTGTAGAGAGSTTACARTTGTCTGGTTGCCTGTAGCACCAGCAC<br>AGAAAGATT               |
| 69          | reverse for F116Y/L125 fixing mutagenic PCR  | ATGACAAAATATGACGATC                                                              |
| 70          | (F116Y fix) F mutagenic fwd                  | GATCGTCATATTTTGCATAYTCTGTAGTAGGTGGAAMAYAKGMWKAGGAACTK<br>HAGAAGCGTCACCAGTGAACAGA |
| 71          | (L125S fix) F mutagenic fwd                  | GATCGTCATATTTTGCATWYTCTGTAGTAGGTGGAAMAYAKGTCGAGGAACTKH<br>AGAAGCGTCACCAGTGAACAGA |
| 72          | (F171H fix) mutagenic fwd - a                | GGAAGACGATACAAGGATGCATGKGGATACGKTYRTGAAGTTGVAWTTGCAGAAAC<br>TAGCGAGCGT           |
| 73          | (F171H fix) mutagenic fwd- b                 | GGAAGACGATACAAGGATGCATRBGATACGKYAMYAAGTTGVAWTTGCAGAAAC<br>TAGCGAGCGT             |
| 240         | segment A rev                                | CTGCTGGAGATGGTGCTAG                                                              |
| 241         | segment A fwd                                | CTAGCACCATCTCCAGCAG                                                              |
| 242         | segmentB rev                                 | TTGGAAATCTTAGATGATGATCGT                                                         |
| 243         | segment B fwd                                | ACGATCATCATCTAAGATTTCCAA                                                         |
| 244         | segment C rev                                | GAATTTCAAGGACAGGAAGATGC                                                          |
| 245         | segment C fwd                                | GCATCTTCTGTCCCTGAAATTC                                                           |
| 248         | segment D fwd                                | CCTTATTGCGTGGTATTG                                                               |
| 249         | segment D rev                                | CAATACCACGCAATAAGG                                                               |
| 250         | BdPYL3 fwd for pBD-GAL4 gibson cloning       | AGTTGACTGTATCGCCGAAATGGAAGCTCACATGGAACG                                          |
| 251         | BdPYL3 rev for pBD-GAL4 gibson cloning       | GACTCACTATAGGGCTCTAGAGTCGACTTAATCTCTGTTCTGGAACCA                                 |
| 348.1       | segment E mutagenic fwd - 5a mutations fixed | GGAAGACGATACAAGGATGTGTTGTGATACGNNKNNKAAGTTGNNKTTGCAGAAAC<br>TAGCGAGCGT           |
| 348.2       | segment E mutagenic fwd - 5b mutations fixed | GGAAGACGATACAAGGATGGCGATTGATACGNNKNNKAAGTTGNNKTTGCAGAAAC<br>TAGCGAGCGT           |
| 349         | segment E rev                                | CATCCTTGTATCGTCTTCC                                                              |
| 353         | segment E mutagenic fwd - 1                  | GGAAGACGATACAAGGATGNNKNNKGATACGGTTGTAAGTTGAAGTTGCAGAAAC<br>TAGCGAGCGT            |
| 354         | segment E mutagenic fwd - 2                  | GGAAGACGATACAAGGATGNNKACTGATACGNNKGTAAAGTTGAAGTTGCAGAAAC<br>TAGCGAGCGT           |
| 355         | segment E mutagenic fwd - 3                  | GGAAGACGATACAAGGATGNNKACTGATACGGTTNNKAAGTTGAAGTTGCAGAAAC<br>TAGCGAGCGT           |
| 356         | segment E mutagenic fwd - 4                  | GGAAGACGATACAAGGATGNNKACTGATACGGTTGTAAGTTGNNKTTGCAGAAAC<br>TAGCGAGCGT            |
| 357         | segment E mutagenic fwd - 5                  | GGAAGACGATACAAGGATGTTNNKGATACGNNKGTAAAGTTGAAGTTGCAGAAAC<br>TAGCGAGCGT            |
| 358         | segment E mutagenic fwd - 6                  | GGAAGACGATACAAGGATGTTNNKGATACGGTTNNKAAGTTGAAGTTGCAGAAACT<br>AGCGAGCGT            |
| 359         | segment E mutagenic fwd - 7                  | GGAAGACGATACAAGGATGTTNNKGATACGGTTGTAAGTTGNNKTTGCAGAAACT<br>AGCGAGCGT             |
| 360         | segment E mutagenic fwd - 8                  | GGAAGACGATACAAGGATGTTACTGATACGNNKNNKAAGTTGAAGTTGCAGAAACT<br>AGCGAGCGT            |

Table S5 – Plasmids constructed and used in this work

| Name                                              | Backbone         | Description                                                                                                                                                                                                                                                                                                                 |
|---------------------------------------------------|------------------|-----------------------------------------------------------------------------------------------------------------------------------------------------------------------------------------------------------------------------------------------------------------------------------------------------------------------------|
| pHO-UASg: <i>envy</i> GFP:ADH1 <sub>ter</sub>     | pHO <sup>2</sup> | HO locus targeted integration of <i>envyGFP</i> <sup>3</sup> under a GAL4 (Y2H)-regulatable promoter.                                                                                                                                                                                                                       |
| pHO-UASg: <i>m-Scarlet-1</i> :ADH1 <sub>ter</sub> | pHO              | HO locus targeted integration of <i>m-Scarlet-1</i> <sup>4</sup> under a GAL4 (Y2H)-regulatable promoter.                                                                                                                                                                                                                   |
| p20StAD                                           | pHO              | Cloning and genome integration of a strong expression cassette containing GAL4-AD fused to a gene of interest. ORF of GAL4-AD, multiple cloning site and LEU2 marker are derived from pACT2. Homology arms for site "20" integration <sup>5</sup> , TDH3 promoter and TDH1 terminator were amplified from Y190 genomic DNA. |
| p20StBD                                           | pHO              | Cloning and genome integration of a strong expression cassette containing GAL4-AD fused to a gene of interest. GAL4-BD, multiple cloning site and TRP3 marker are derived from pBD-GAL4. Homology arms for site "21" integration <sup>5</sup> , TDH3 promoter and TDH1 terminator were amplified from Y190 genomic DNA.     |

1. Menne, H. & Kocher, H. HRAC Classification of Herbicides and Resistance Development. *Mod. Crop Prot. Compd.* **1**, 5–26 (2008).
2. Voth, W. P., Richards, J. D., Shaw, J. M. & Stillman, D. J. Yeast vectors for integration at the HO locus. *Nucleic Acids Res.* **29**, 10–13 (2001).
3. Article, R. Plasmids for C-terminal tagging in *Saccharomyces cerevisiae* that contain improved GFP proteins, Envy and Ivy. *Yeast* 379–387. doi:10.1002/yea
4. Bindels, D. S. *et al.* MScarlet: A bright monomeric red fluorescent protein for cellular imaging. *Nat. Methods* **14**, 53–56 (2016).
5. Dongmei Bai Flagfeldt, Verena Siewers, Le Huang, and J. N. Characterization of chromosomal integration sites for heterologous gene expression in *Saccharomyces cerevisiae*. *Yeast* **26**, 545–551 (2009).
